# Supplementary material
Source: Springer Nature journal article supplement (https://www.springermedizin.de/resource/supplementary/12888_2009_570_MOESM2_ESM.pdf/9483626)

**KIDNET**  
**Med-Relax**

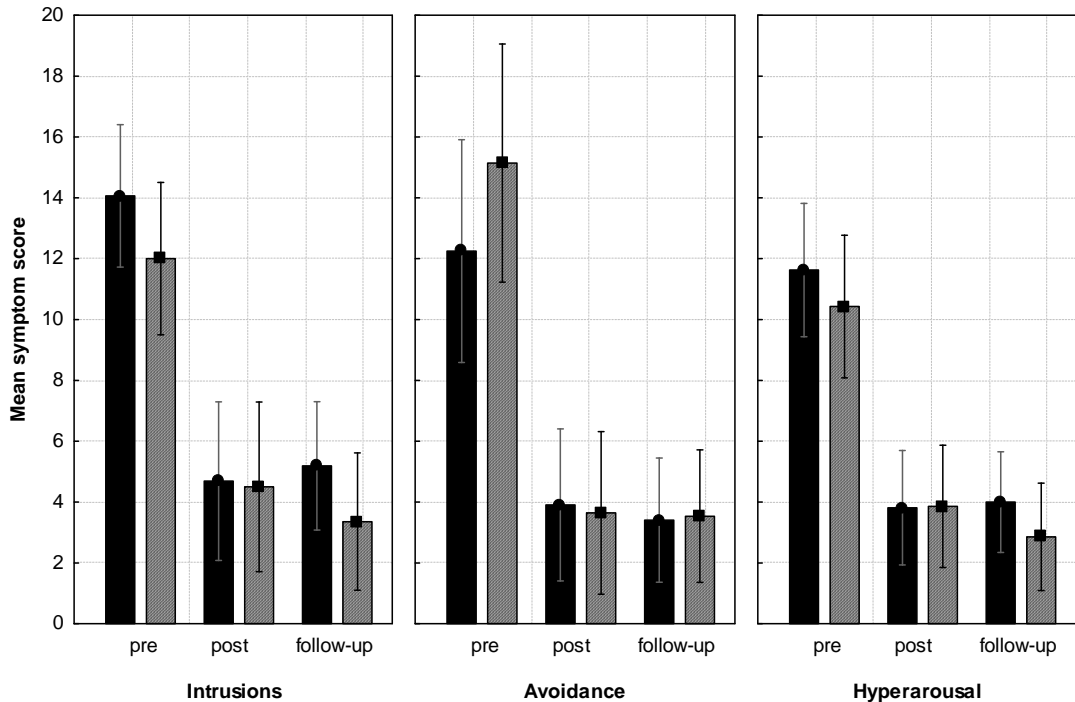

Supplement: MOESM2 [file 9483626]
